# Supplementary material
Source: PubMed Central journal article supplement (PMC6644309)
Supplement: ao8b02144_si_001.pdf [file ao8b02144_si_001.pdf]

## **Supporting Information**

### **Enhanced solubility of telmisartan phthalic acid cocrystals within the pH range of systemic absorption site**

Sudeshna Kundu<sup>†</sup>, Nimmy Kumari<sup>†</sup>, Saundray Raj Soni<sup>†</sup>, Subham Ranjan<sup>§</sup>, Rajan Kumar<sup>‡</sup>,  
Ashoke Sharon<sup>‡\*</sup> and Animesh Ghosh<sup>†\*</sup>

<sup>†</sup> Department of Pharmaceutical Sciences and Technology and <sup>‡</sup> Department of Chemistry,  
Birla Institute of Technology, Mesra, Ranchi 835215, India.

<sup>§</sup> Department of Chemical Sciences, Indian Institute of Science Education and Research  
(IISER) Kolkata, Mohanpur Campus, Mohanpur 741252, India.

Corresponding Authors:

\*E-mail: aghosh@bitmesra.ac.in, anim\_1607@yahoo.co.in. Phone: +91-651-2276247. Fax: +91-651-  
2275290 (A.G.).

\*E-mail: asharon@bitmesra.ac.in. Phone: +91-651-2276531. Fax: +91-651-2275401 (A.S.).

## Table of contents

- **Table S1** Preliminary screening of cofomers by solution crystallization method
- **Figure S1 a)**  $^1\text{H}$  NMR spectrum of TPS cocystal system showing acidic protons at  $\delta$  13.35. **b)**  $\text{D}_2\text{O}$  exchange spectrum of TPS cocystal system showing disappearance of acidic protons.
- **Figure S2**  $^1\text{H}$  NMR spectrum of TPS cocystal system showing distinguished  $\text{CH}_2$  peak of TLM ( $\delta$ : 5.54, s, 2H) with 2H integration in comparison to 18 H integration ( $\delta$ : 7.14-7.69) for aromatic protons.
- **Figure S3**  $^1\text{H}$  NMR spectrum of TPS cocystal system showing distinguished  $\text{CH}_2$  peak of TLM (blue  $\delta$ : 2.90, t, 2H) with 1 integration in comparison to 0.5 integration for  $\text{CH}_2$  proton of ethanol ( $\delta$ : 3.35-3.40).
- **Figure S4 a)**  $^1\text{H}$  NMR spectrum of TPR cocystal system showing acidic protons at  $\delta$  13.26. **b)**  $\text{D}_2\text{O}$  exchange spectrum of TPS cocystal system showing disappearance of acidic protons.
- **Figure S5**  $^1\text{H}$  NMR spectrum of TPR cocystal system showing distinguished  $\text{CH}_2$  peak of TLM (blue  $\delta$ : 2.91, t, 2H) with 1 integration in comparison to 0.3 integration for  $\text{CH}_2$  proton of ethanol ( $\delta$ : 3.35-3.41).
- **Table S2** Initial and equilibrium solution pH, final solid phases of TLM, TPS and TPR obtained after 72 hr. of solubility experiment
- **References**

**Table S1** Preliminary screening of cofomers by solution crystallization method

| Sl. No. | Cofomers <sup>(a)</sup>              | pK <sub>a</sub> values of cofomer                   | Solvent used for crystallization | Inference                                                                     |
|---------|--------------------------------------|-----------------------------------------------------|----------------------------------|-------------------------------------------------------------------------------|
| 1.      | D-Tryptophan <sup>1</sup>            | pK <sub>a1</sub> =2.38<br>pK <sub>a2</sub> =9.39    | Chloroform:<br>ethanol (1:1)     | Sticky mass                                                                   |
| 2.      | Nicotinamide <sup>2</sup>            | 3.35                                                | Ethanol                          | Sticky mass                                                                   |
| 3.      | Maleic acid <sup>3</sup>             | pK <sub>a1</sub> =1.94<br>pK <sub>a2</sub> =6.22    | Chloroform:<br>ethanol (2:1)     | <b>Hit (new solid form)</b> Crystal size was not suitable for SCXRD analysis. |
|         |                                      |                                                     | Acetone                          |                                                                               |
| 4.      | Nicotinic acid <sup>4</sup>          | pK <sub>a1</sub> =4.75                              | Ethanol                          | Sticky mass                                                                   |
| 5.      | Para amino benzoic acid <sup>5</sup> | pK <sub>a1</sub> = 2.38<br>pK <sub>a2</sub> = 4.85  | Chloroform:<br>methanol (1:1)    | No crystals obtained                                                          |
| 6.      | Urea <sup>6</sup>                    | 0.10                                                | Chloroform:<br>ethanol (2:1)     | No crystals obtained                                                          |
| 7.      | Sorbic acid <sup>7</sup>             | 4.76                                                | Methanol                         | No crystals obtained                                                          |
| 8.      | L-proline <sup>8</sup>               | pK <sub>a1</sub> =1.99<br>pK <sub>a2</sub> =10.60   | Chloroform:<br>methanol (2:1)    | Sticky mass                                                                   |
| 9.      | Phthalic acid <sup>9</sup>           | pK <sub>a1</sub> = 2.76,<br>pK <sub>a2</sub> = 4.92 | Chloroform:<br>ethanol (2:1)     | <b>Hit (Ethanol solvate of Telmisartan phthalic acid cocrystal)</b>           |
| 10.     | Malic acid <sup>10</sup>             | pK <sub>a1</sub> = 3.51,<br>pK <sub>a2</sub> = 5.03 | Chloroform:<br>methanol (1:1)    | No crystals obtained                                                          |

|            |                             |                                                         |                                           |                      |
|------------|-----------------------------|---------------------------------------------------------|-------------------------------------------|----------------------|
| <b>11.</b> | Glutamic acid <sup>11</sup> | $pK_{a1} = 2.19,$<br>$pK_{a2}=4.25, pK_{a3}$<br>$=9.67$ | Chloroform: 1-<br>propanol (2:1)          | Sticky mass          |
| <b>12.</b> | Adipic acid <sup>12</sup>   | $pK_{a1}= 4.43,$<br>$pK_{a2}= 5.41$                     | Chloroform:<br>methanol (1:1)             | No crystals obtained |
| <b>13.</b> | Citric acid <sup>13</sup>   | 2.79                                                    | Chloroform:<br>isopropyl alcohol<br>(2:1) | No crystals obtained |
| <b>14.</b> | Benzoic acid <sup>14</sup>  | 4.20                                                    | Chloroform:<br>methanol (1:1)             | No crystals obtained |
| <b>15.</b> | Oxalic acid <sup>15</sup>   | $pK_{a1}=1.46,$<br>$pK_{a2}=4.40$                       | Chloroform:<br>methanol (1:1)             | No crystals obtained |
| <b>16.</b> | Succinic acid <sup>16</sup> | $pK_{a1}= 4.20,$<br>$pK_{a2}= 5.63$                     | Chloroform:<br>methanol (1:1)             | No crystals obtained |

<sup>a</sup>One molar equivalent of drug and coformer were used

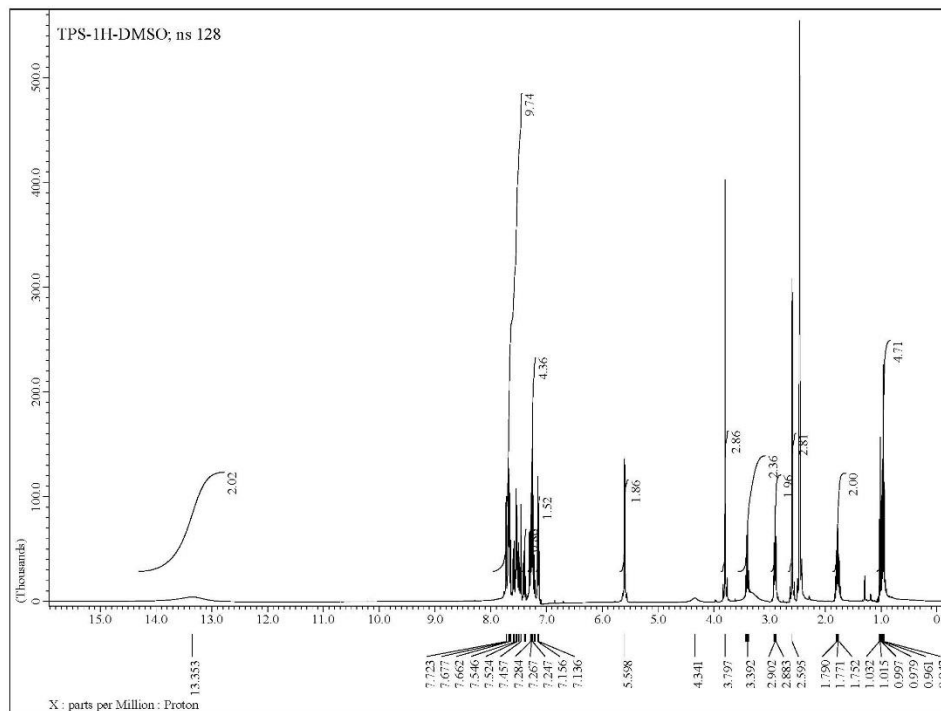

(a)

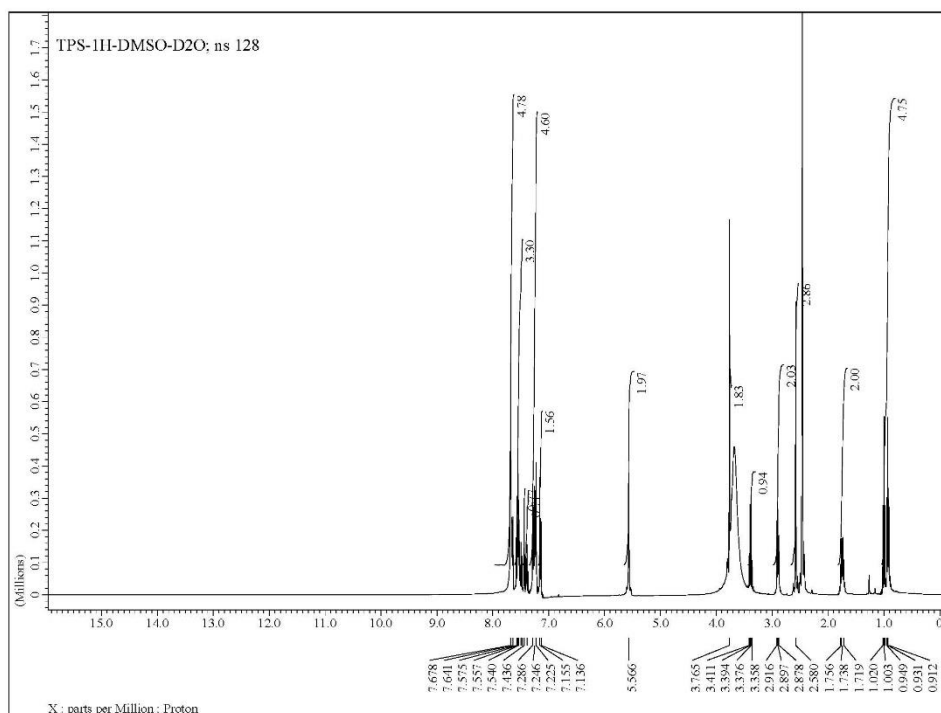

(b)

**Figure S1 a)**  $^1\text{H}$  NMR spectrum of TPS cocrystal system showing acidic protons at  $\delta$  13.35. **b)**  $\text{D}_2\text{O}$  exchange spectrum of TPS cocrystal system showing disappearance of acidic protons.

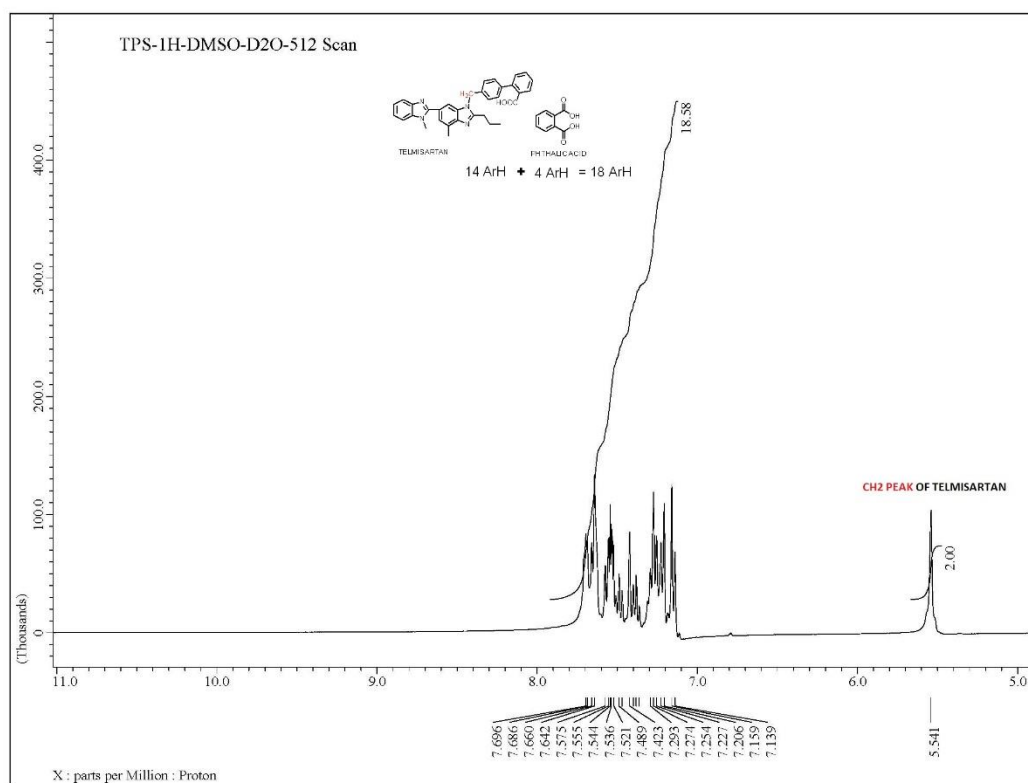

**Figure S2** <sup>1</sup>H NMR spectrum of TPS cocrystal system showing distinguished CH<sub>2</sub> peak of TLM ( $\delta$ : 5.54, s, 2H) with 2H integration in comparison to 18 H integration ( $\delta$ : 7.14-7.69) for aromatic protons. Thus, the presence of 18 aromatic protons in comparison to 2H of TLM confirms the presence of TLM:PH in 1:1 ratio in TPS cocrystal.

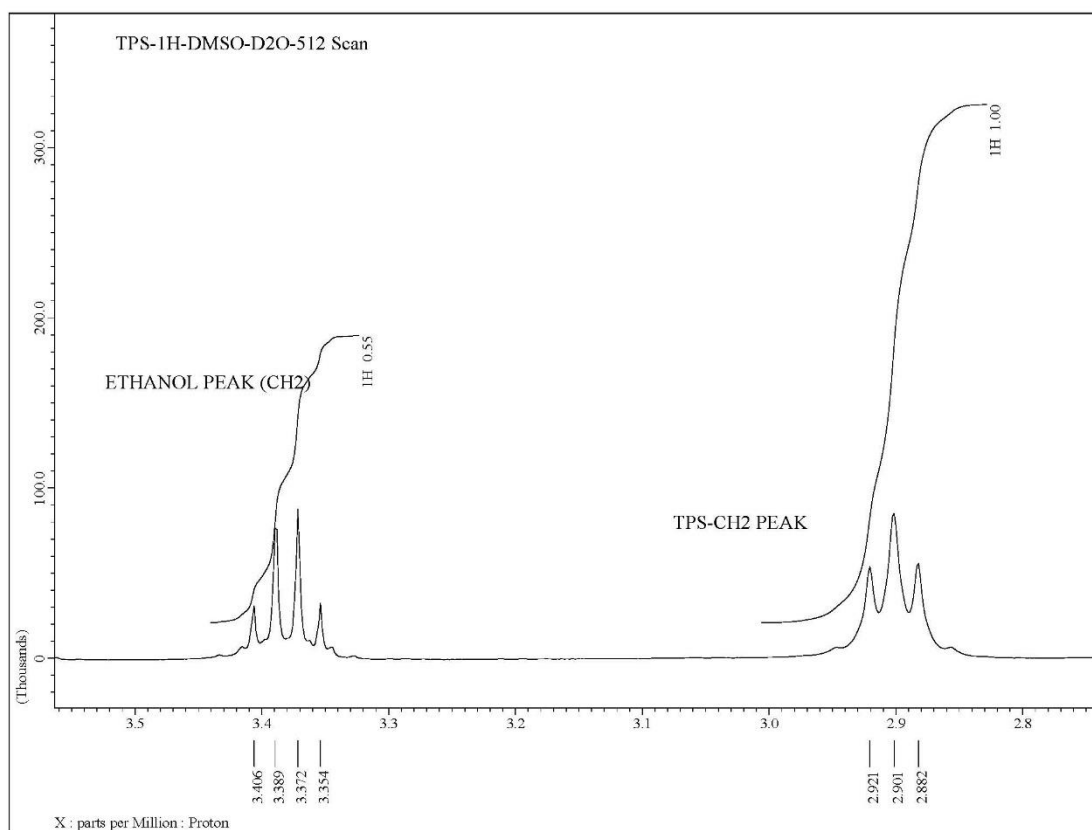

**Figure S3** <sup>1</sup>H NMR spectrum of TPS cocrystal system showing distinguished CH<sub>2</sub> peak of TLM (blue δ: 2.90, t, 2H) with 1 integration in comparison to 0.5 integration for CH<sub>2</sub> proton of ethanol (δ: 3.35-3.40). Thus, the presence of half ratio of ethanol in comparison to unit ratio of TLM confirms the presence of TLM: Ethanol in 1:0.5 ratio in TPS cocrystal.

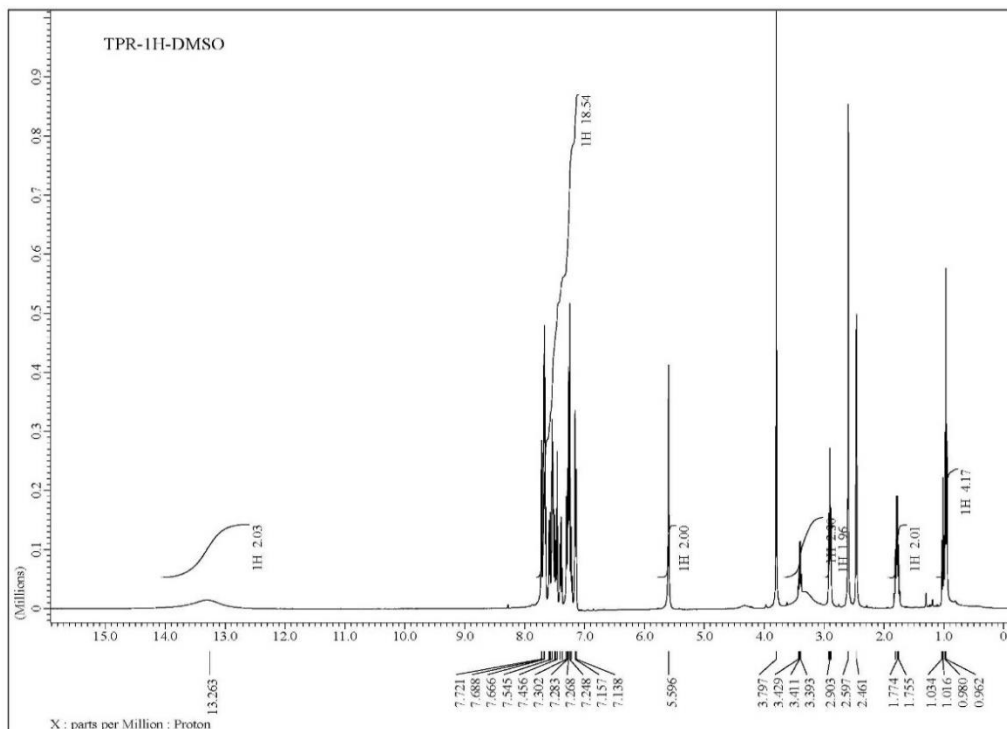

(a)

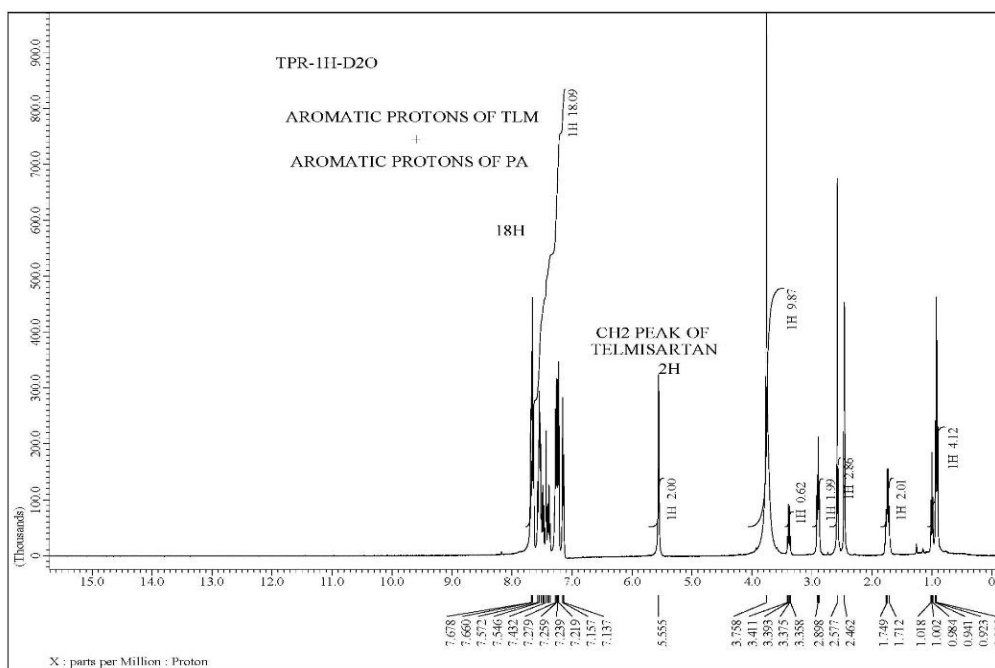

(b)

**Figure S4 a)**  $^1\text{H}$  NMR spectrum of TPR cocrystal system showing acidic protons at  $\delta$  13.26. **b)**  $\text{D}_2\text{O}$  exchange spectrum of TPS cocrystal system showing disappearance of acidic protons. The presence of 18 aromatic protons in comparison to 2H of TLM confirms the presence of TLM (14 ArH):PH (4 ArH) in 1:1 ratio in TPS cocrystal.



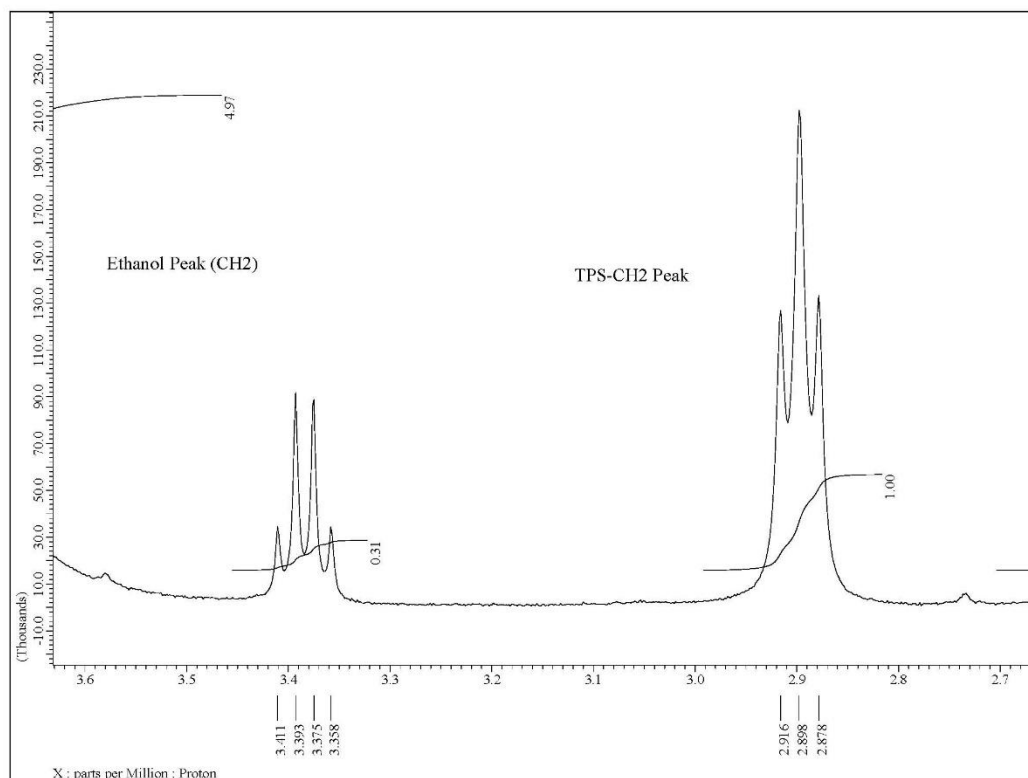

**Figure S5**  $^1\text{H}$  NMR spectrum of TPR cocrystal system showing distinguished  $\text{CH}_2$  peak of TLM (blue  $\delta$ : 2.91, t, 2H) with 1 integration in comparison to 0.3 integration for  $\text{CH}_2$  proton of ethanol ( $\delta$ : 3.35-3.41). Thus, the presence of ethanol in comparison to unit ratio of TLM confirms the presence of TLM: Ethanol in 1:0.3 ratio in TPR cocrystal.

**Table S2** Initial and equilibrium solution pH, final solid phases of TLM, TPS and TPR obtained after 72 hr. of solubility experiment

| Initial solid phase | Initial solution pH | Equilibrium solution pH |
|---------------------|---------------------|-------------------------|
| TLM                 | <b>3</b>            | <b>3.09</b>             |
|                     | <b>4</b>            | <b>4.23</b>             |
|                     | <b>5</b>            | <b>5.32</b>             |
|                     | <b>6</b>            | <b>6.12</b>             |
|                     | <b>7</b>            | <b>7.03</b>             |
|                     | <b>8</b>            | <b>7.98</b>             |
|                     | <b>9</b>            | <b>8.8</b>              |
|                     | <b>10</b>           | <b>9.29</b>             |

| Initial solid phase | Initial solution pH | Equilibrium solution pH | Final solid phase as determined by PXRD |
|---------------------|---------------------|-------------------------|-----------------------------------------|
| TPS                 | <b>3</b>            | <b>3.06</b>             | <b>TPS</b>                              |
|                     | <b>4</b>            | <b>3.50</b>             | <b>TPS</b>                              |
|                     | <b>5</b>            | <b>3.81</b>             | <b>TPS</b>                              |
|                     | <b>6</b>            | <b>5</b>                | <b>TPS + TLM</b>                        |
|                     | <b>7</b>            | <b>6.77</b>             | <b>TPS + TLM</b>                        |
|                     | <b>8</b>            | <b>6.09</b>             | <b>TLM</b>                              |
|                     | <b>9</b>            | <b>7.22</b>             | <b>TLM</b>                              |
|                     | <b>10</b>           | <b>7.22</b>             | <b>TLM</b>                              |

| Initial solid phase | Initial solution pH | Equilibrium solution pH | Final solid phase as determined by PXRD |
|---------------------|---------------------|-------------------------|-----------------------------------------|
| TPR                 | <b>3</b>            | <b>3.06</b>             | <b>TPR</b>                              |
|                     | <b>4</b>            | <b>3.49</b>             | <b>TPR</b>                              |
|                     | <b>5</b>            | <b>3.52</b>             | <b>TPR</b>                              |
|                     | <b>6</b>            | <b>4.37</b>             | <b>TPR</b>                              |
|                     | <b>7</b>            | <b>6.69</b>             | <b>TPR+TLM</b>                          |
|                     | <b>8</b>            | <b>7.1</b>              | <b>TLM</b>                              |
|                     | <b>9</b>            | <b>7.14</b>             | <b>TLM</b>                              |
|                     | <b>10</b>           | <b>6.77</b>             | <b>TLM</b>                              |

## References

1. National Center for Biotechnology Information. PubChem Compound Database; CID=6305, <https://pubchem.ncbi.nlm.nih.gov/compound/6305> (accessed Dec, 2017).
2. National Center for Biotechnology Information. PubChem Compound Database; CID=936, <https://pubchem.ncbi.nlm.nih.gov/compound/936> (accessed Dec, 2017).
3. National Center for Biotechnology Information. PubChem Compound Database; CID=444266, <https://pubchem.ncbi.nlm.nih.gov/compound/444266> (accessed Dec, 2017).
4. National Center for Biotechnology Information. PubChem Compound Database; CID=938, <https://pubchem.ncbi.nlm.nih.gov/compound/938> (accessed Dec, 2017).
5. National Center for Biotechnology Information. PubChem Compound Database; CID=978, <https://pubchem.ncbi.nlm.nih.gov/compound/978> (accessed Dec, 2017).
6. National Center for Biotechnology Information. PubChem Compound Database; CID=1176, <https://pubchem.ncbi.nlm.nih.gov/compound/1176> (accessed Dec, 2017).
7. National Center for Biotechnology Information. PubChem Compound Database; CID=643460, <https://pubchem.ncbi.nlm.nih.gov/compound/643460> (accessed Dec, 2017).
8. National Center for Biotechnology Information. PubChem Compound Database; CID=145742, <https://pubchem.ncbi.nlm.nih.gov/compound/145742> (accessed Dec, 2017).
9. National Center for Biotechnology Information. PubChem Compound Database; CID=1017, <https://pubchem.ncbi.nlm.nih.gov/compound/1017> (accessed Dec, 2017).
10. National Center for Biotechnology Information. PubChem Compound Database; CID=525, <https://pubchem.ncbi.nlm.nih.gov/compound/525> (accessed Dec, 2017).
11. National Center for Biotechnology Information. PubChem Compound Database; CID=33032, <https://pubchem.ncbi.nlm.nih.gov/compound/33032> (accessed Dec, 2017).
12. National Center for Biotechnology Information. PubChem Compound Database; CID=196, <https://pubchem.ncbi.nlm.nih.gov/compound/196> (accessed Dec, 2017).

13. National Center for Biotechnology Information. PubChem Compound Database; CID=311, <https://pubchem.ncbi.nlm.nih.gov/compound/311> (accessed Dec, 2017).
14. National Center for Biotechnology Information. PubChem Compound Database; CID=243, <https://pubchem.ncbi.nlm.nih.gov/compound/243> (accessed Dec 7, 2017).
15. National Center for Biotechnology Information. PubChem Compound Database; CID=971, <https://pubchem.ncbi.nlm.nih.gov/compound/971> (accessed Dec, 2017).
16. National Center for Biotechnology Information. PubChem Compound Database; CID=1110, <https://pubchem.ncbi.nlm.nih.gov/compound/1110> (accessed Dec, 2017).
